# Supplementary material for: Metal-directed assembly of coordination polymers with the versatile ligand 2-(1H-benzotriazol-1-yl) acetic acid: from discrete structures to two-dimensional networks
Source: Royal Society of Chemistry journal article supplement (doi:10.1039/c3ce42099j), 2013-12-20
Supplement: c3ce42099j.pdf [file c3ce42099j.pdf]

## Supporting Information

# Metal-directed assembly of coordination polymers with the versatile ligand 2-(1*H*-benzotriazol-1-yl)acetic acid: from discrete structures to two-dimensional networks

Jin-Hua Wang,<sup>a</sup> Gui-Mei Tang,<sup>\*a</sup> Yong-Tao Wang,<sup>\*a</sup> Ting-Xiao Qin,<sup>a</sup> Seik Weng Ng<sup>b</sup>

<sup>a</sup> Department of Chemical Engineering, Shandong Provincial Key Laboratory of Fine Chemicals, Qilu University of Technology, Jinan, 250353, P. R. China.

<sup>b</sup> Department of Chemistry, University of Malaya, Kuala Lumpur, 50603, Malaysia

\* Corresponding author. E-mail: [ceswyt@sohu.com](mailto:ceswyt@sohu.com) (Y.-T. Wang); [meiguit@163.com](mailto:meiguit@163.com) (G.-M. Tang). Fax: int code +86 0531 8963 1207. Tel: +86 0531 8963 1207

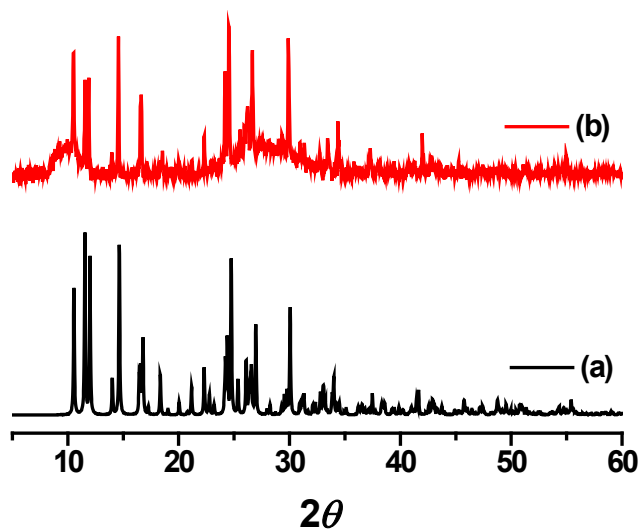

**Figure S1.** Powder X-ray diffraction (PXRD) plots. (a) **1** (simulated); (b) powder of **1** (experimental).

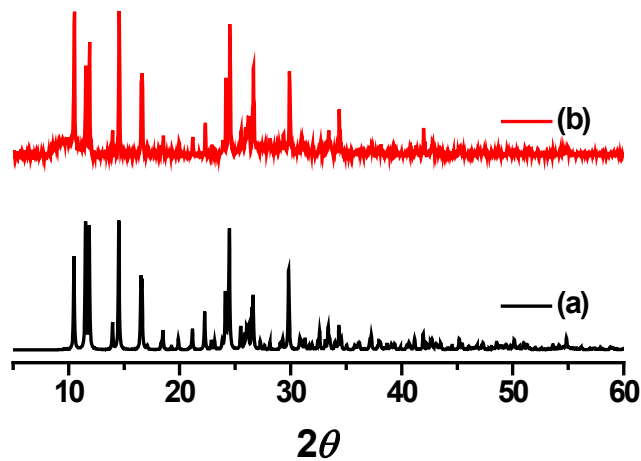

**Figure S2.** PXRD plots. (a) **2** (simulated); (b) powder of **2** (experimental).

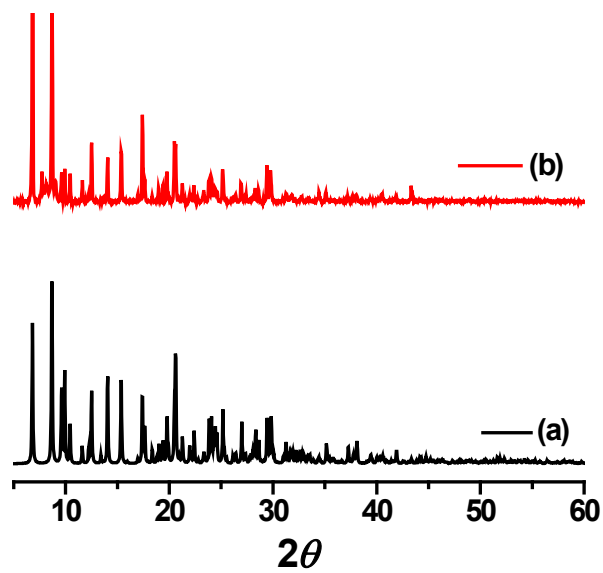

**Figure S3.** PXRD plots. (a) **3** (simulated); (b) powder of **3** (experimental).

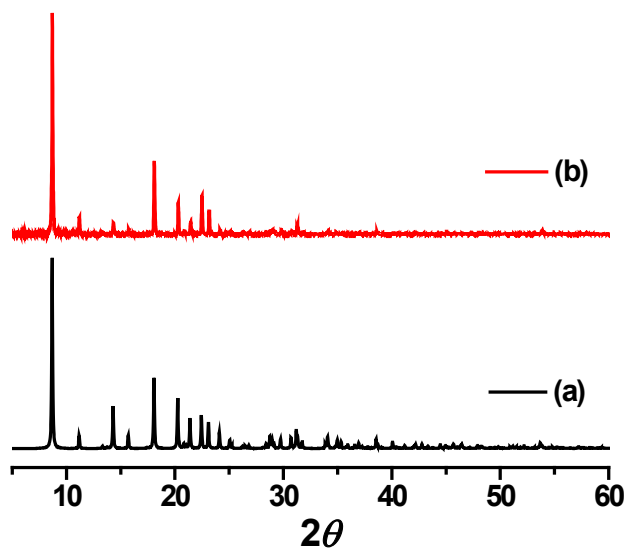

**Figure S4.** PXRD plots. (a) **4** (simulated); (b) powder of **4** (experimental).

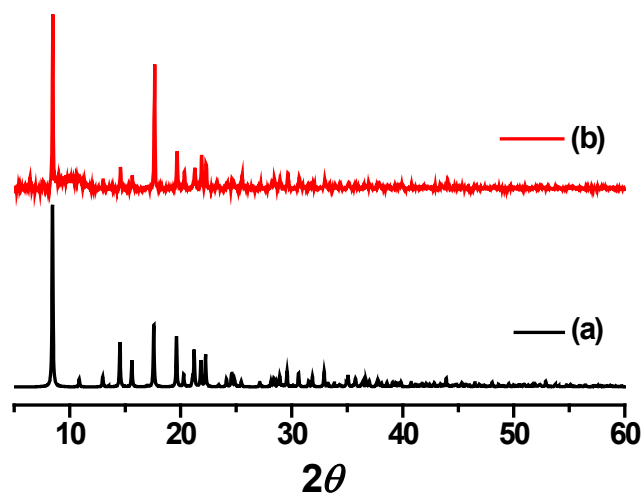

**Figure S5.** PXRD plots. (a) **5** (simulated); (b) powder of **5** (experimental).

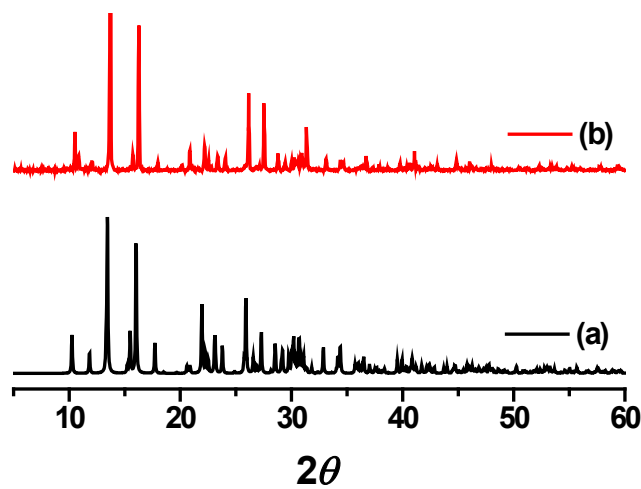

**Figure S6.** PXRD plots. (a) **6** (simulated); (b) powder of **6** (experimental).

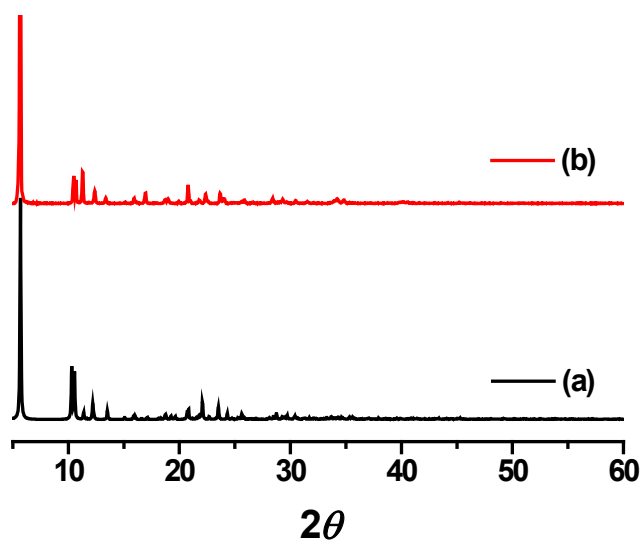

**Figure S7.** PXRD plots. (a) **7** (simulated); (b) powder of **7** (experimental).

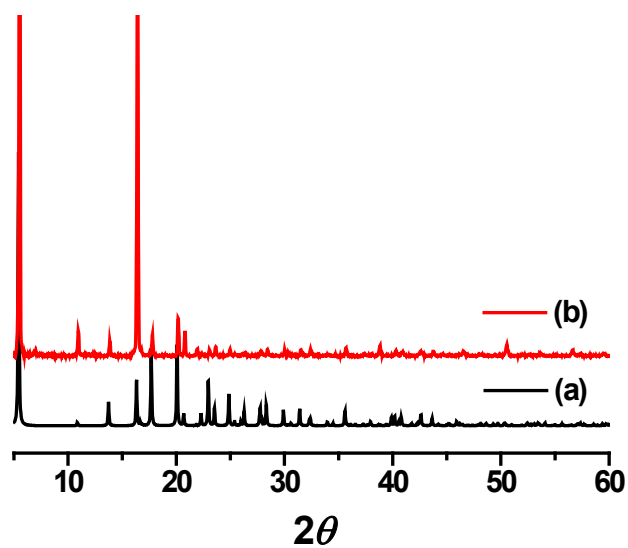

**Figure S8.** PXRD plots. (a) **8** (simulated); (b) powder of **8** (experimental).

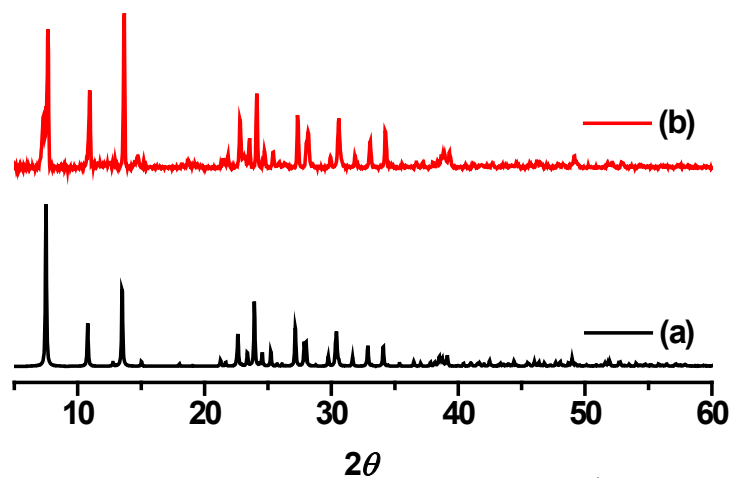

**Figure S9.** PXR D plots. (a) **BTA-Ag** (simulated from the literature<sup>1</sup>); (b) powder of **BTA-Ag** (our primarily experimental).

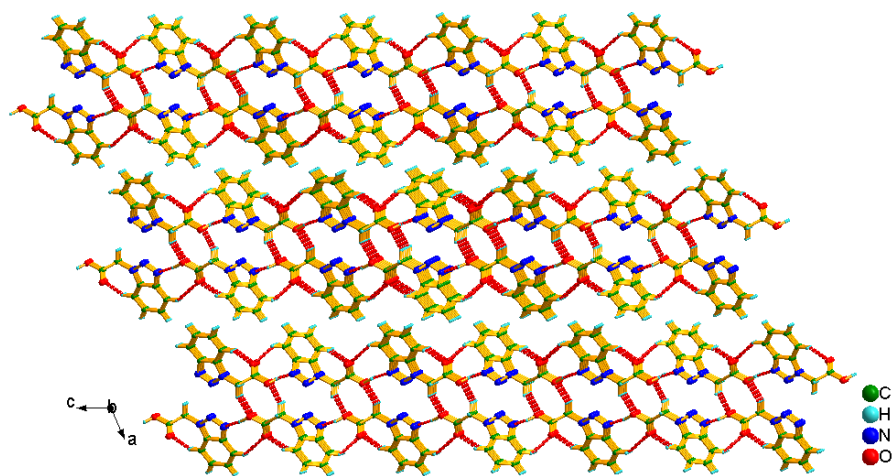

**Figure S10.** Packing diagram of HBTA along the *b* axis.

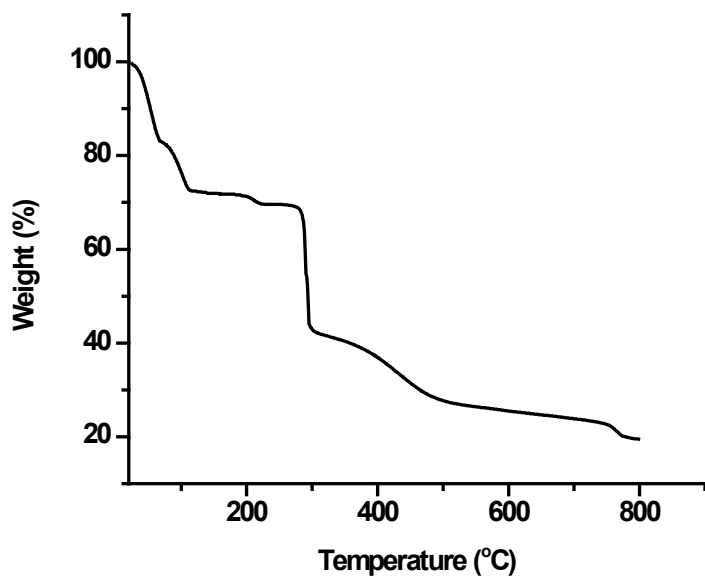

Figure S11. TGA cure of 1.

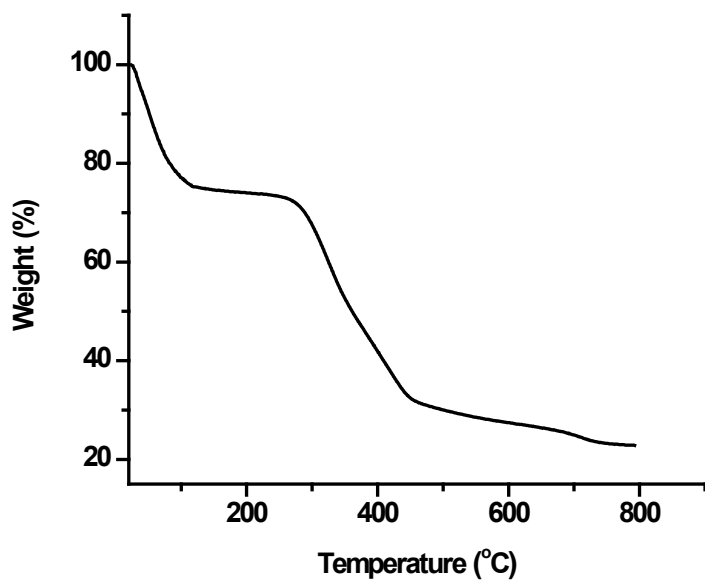

Figure S12. TGA cure of 2.

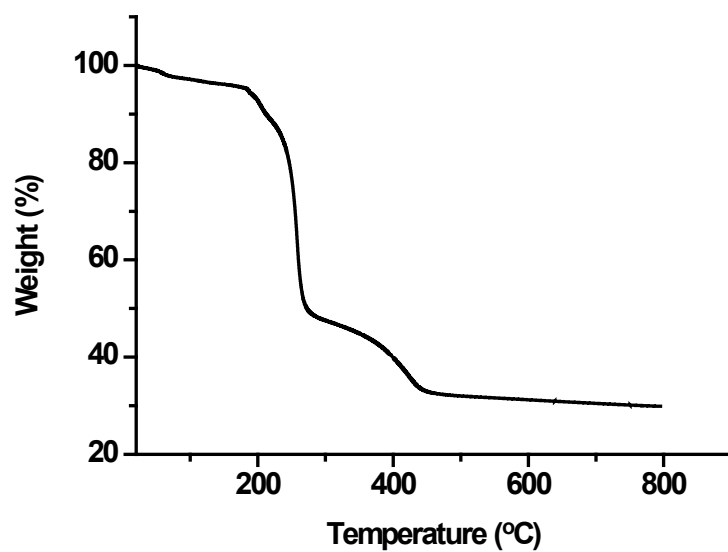

Figure S13. TGA cure of 3.

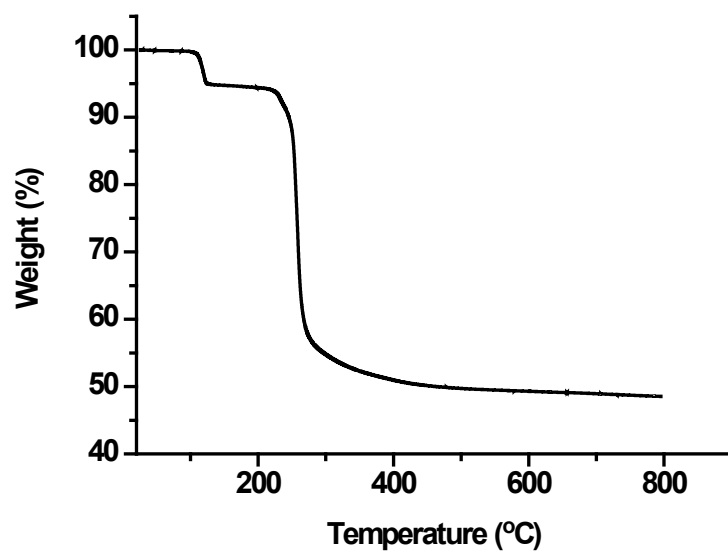

Figure S14. TGA cure of 4.



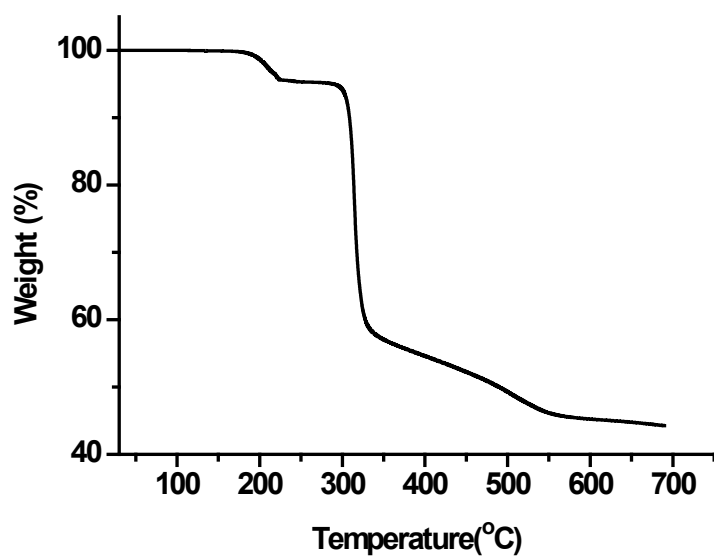

Figure S15. TGA cure of 5.

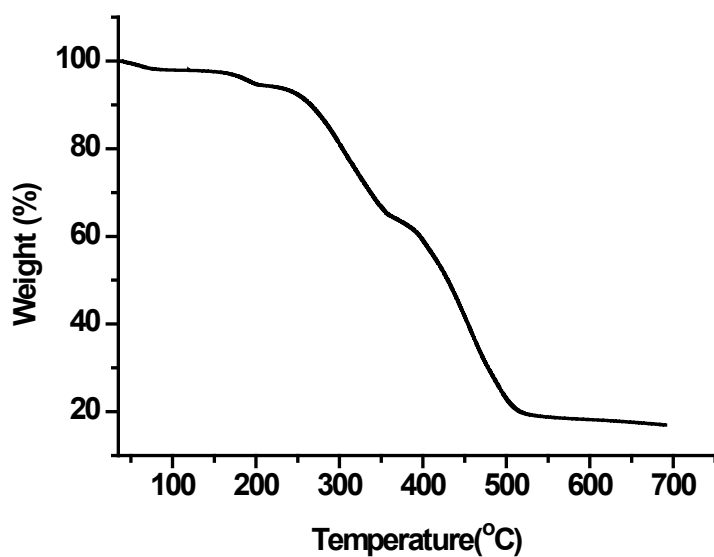

Figure S16. TGA cure of 6.

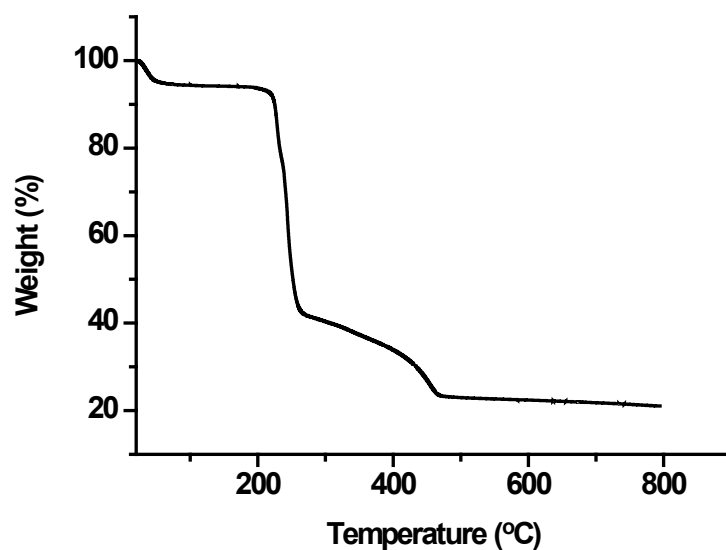

Figure S17. TGA cure of 7.

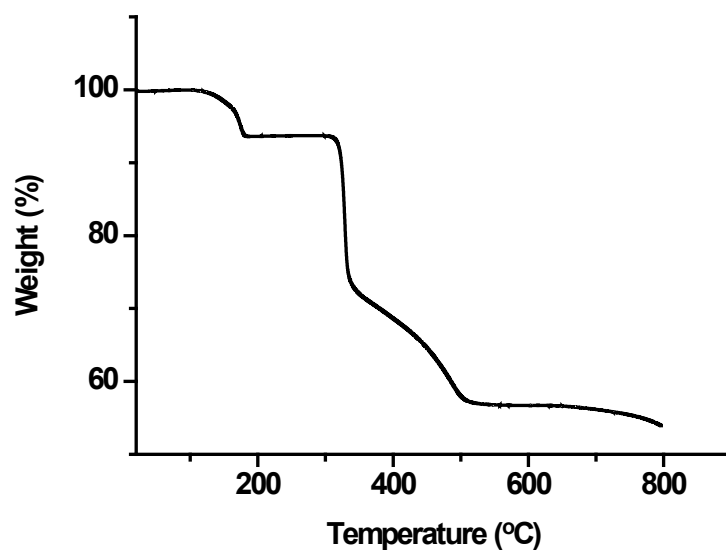

Figure S18. TGA cure of 8.

#### References

1. Hu, T. L.; Du, W. P.; Hu, B. W.; Li, J. R.; Bu, X. H.; Cao, R., Novel Ag(I) complexes withazole heterocycle ligands bearing acetic acid group: synthesis, characterization and crystal structures. *CrystEngComm* **2008**, *10* (8), 1037-1043.
